# Supplementary material for: Dietary micro-fibrillated cellulose improves gut health and piglet performance at weaning
Source: Research Square preprint supplement (doi:10.21203/rs.3.rs-1764101/v1), 2022-06-16
Supplement: Supplementary file 1 [file b43727e94b7fef7b46d3c9e6.docx]

**Table S3.** Ingredient and nutrient composition of piglets’ creep feed, post-weaning feed.

| **Preweaning creep feed** | | **Post-weaning feed** | | **Post-weaning feed** | |
| --- | --- | --- | --- | --- | --- |
| **(7-22)** | | **23-35 d** | | **35-49 d** | |
| **Control** | **MFC** | **Control** | **MFC** | **Control** | **MFC** |
| Dehulled oats 21.62 | Dehulled oats 21.62 | Barley 30.0 | Barley 30.0 | Barley 30.00 | Barley 30.00 |
| Wheat 20.00 | Wheat 20.00 | Dehulled oats 15.94 | Dehulled oats 15.94 | Wheat 20.30 | Wheat 20.30 |
| Barley 13.40 | Barley 13.30 | Wheat 14.60 | Wheat 14.60 | Dehulled oats 18.04 | Dehulled oats 18.04 |
| Steamed corn 10.00 | Steamed corn 10.00 | Whey powder 5.28 | Whey powder 5.28 | Oats 6.30 | Oats 6.30 |
| Skimmed milk powder 6.64 | Skimmed milk powder 6.64 | Steamed corn 5.00 | Steamed corn 5.00 | Wheat bran 5.00 | Wheat bran 5.00 |
| Whey meal 5.38 | Whey meal 5.38 | Wheat bran 4.00 | Wheat bran 4.00 | Soyabean meal 3.10 | Soyabean meal 3.10 |
| Oats 3.50 | Oats 3.50 | Oats 3.60 | Oats 3.60 | Premixes 2.56 | Premixes 2.56 |
| Premixes 3.08 | Premixes 3.08 | Premixes 3.50 | Premixes 3.50 | Soya protein concentrate 2.03 | Soya protein concentrate 2.03 |
| Fish meal 2.50 | Fish meal 2.50 | Oat hulls 3.00 | Oat hulls 3.00 | Potato protein 2.00 | Potato protein 2.00 |
| Coconut oil 1.95 | Coconut oil 1.95 | Skimmed milk powder 2.64 | Skimmed milk powder 2.64 | Whey powder 1.48 | Whey powder 1.48 |
| Wheat bran 1.90 | Wheat gluten 1.51 | Potato protein 2.16 | Potato protein 2.16 | Linseed expeller 1.30 | Linseed expeller 1.30 |
| Wheat gluten 1.51 | Amino acids 1.50 | Soya protein concentrate 2.12 | Soya protein concentrate 2.12 | Amino acids 1.18 | Amino acids 1.18 |
| Amino acids 1.50 | Linseed expeller 1.50 | Linseed expeller 1.30 | Linseed expeller 1.30 | Glucose 1.02 | Glucose 1.02 |
| Linseed expeller 1.50 | Potato protein 1.37 | Vegetable oils and fatty acids 1.25 | Vegetable oils and fatty acids 1.25 | Fish meal 1.00 | Fish meal 1.00 |
| Potato protein 1.37 | Glucose 1.17 | Glucose 1.07 | Glucose 1.07 | Vegetable oils and fatty acids 1.00 | Vegetable oils and fatty acids 1.00 |
| Glucose 1.17 | Soya protein concentrate 1.10 | Fish meal 1.00 | Fish meal 1.00 | Progut. yeast hydrolysate 0.96 | Progut. yeast hydrolysate 0.96 |
| Soya protein concentrate 1.10 | MFC-fibre 1.00 | Amino acids 0.90 | Amino acids 0.90 | Calcium carbonate 0.76 | Calcium carbonate 0.76 |
| Vegetable oils and fatty acids 0.55 | Wheat bran 1.00 | Coconut oil 0.77 | Coconut oil 0.77 | Skimmed milk powder 0.72 | Skimmed milk powder 0.72 |
| Salt 0.46 | Vegetable oils and fatty acids 0.55 | Wheat gluten 0.60 | Wheat gluten 0.60 | Salt 0.46 | Salt 0.46 |
| Progut. yeast hydrolysate 0.32 | Salt 0.46 | Salt 0.44 | Salt 0.44 | Defluorinated monocalcium phosphate 0.30 | Defluorinated monocalcium phosphate 0.30 |
| Defluorinated monocalcium phosphate 0.30 | Progut. yeast hydrolysate 0.32 | Defluorinated monocalcium phosphate 0.37 | Defluorinated monocalcium phosphate 0.37 | Coconut oil 0.21 | Coconut oil 0.21 |
| Lactose 0.15 | Defluorinated monocalcium phosphate 0.30 | Progut. yeast hydrolysate 0.30 | Progut. yeast hydrolysate 0.30 | Wheat gluten 0.16 | Wheat gluten 0.16 |
| Progres. tall oil fatty acids 0.10 | Lactose 0.15 | Progres. tall oil fatty acids 0.10 | Progres. tall oil fatty acids 0.10 | Progres. tall oil fatty acids 0.10 | Progres. tall oil fatty acids 0.10 |
|  | Progres. tall oil fatty acids 0.10 | Lactose 0.06 | Lactose 0.06 | Lactose 0.02 | Lactose 0.02 |
|  | MFC 1.00 |  | MFC 2.00 |  | MFC 2.00 |
